# Supplementary material for: Identifying circRNA-associated-ceRNA networks in juvenile spondyloarthropathies patients
Source: Springer Nature journal article supplement (doi:10.1186/s12969-023-00855-2), 2023-07-28

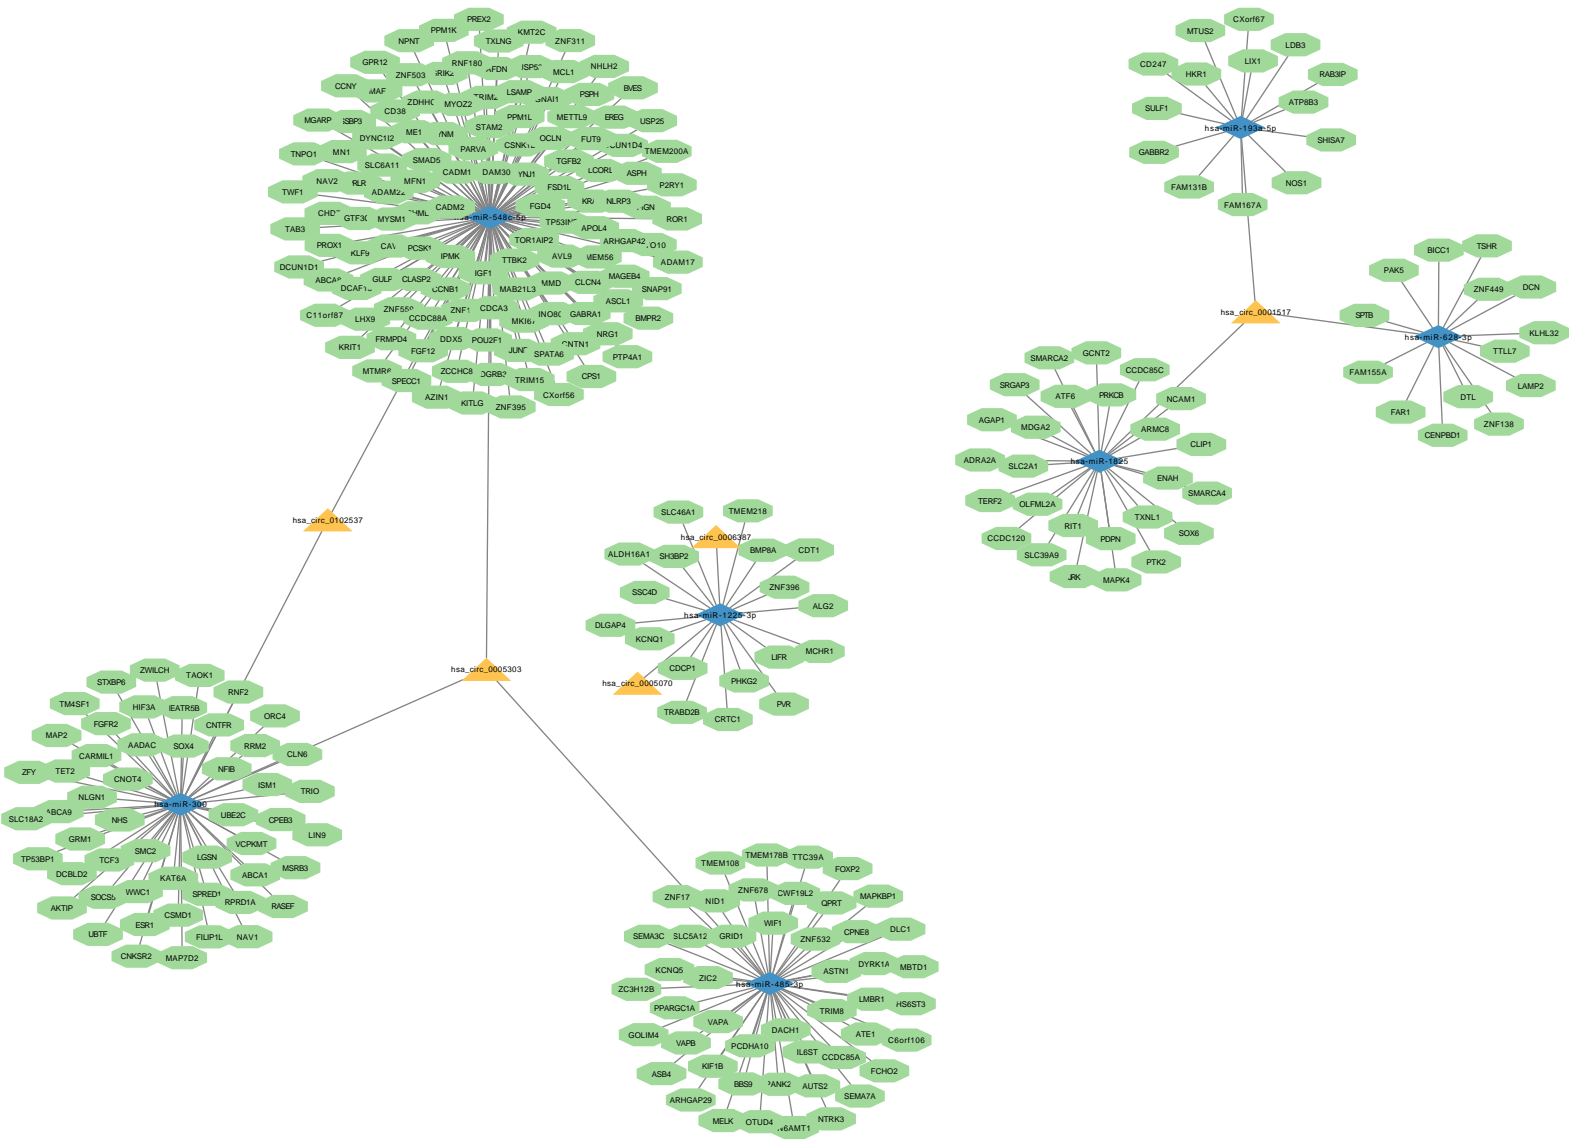

Supplement: MOESM2 [file 25859636]
